# Supplementary material
Source: PubMed Central journal article supplement (PMC4103995)

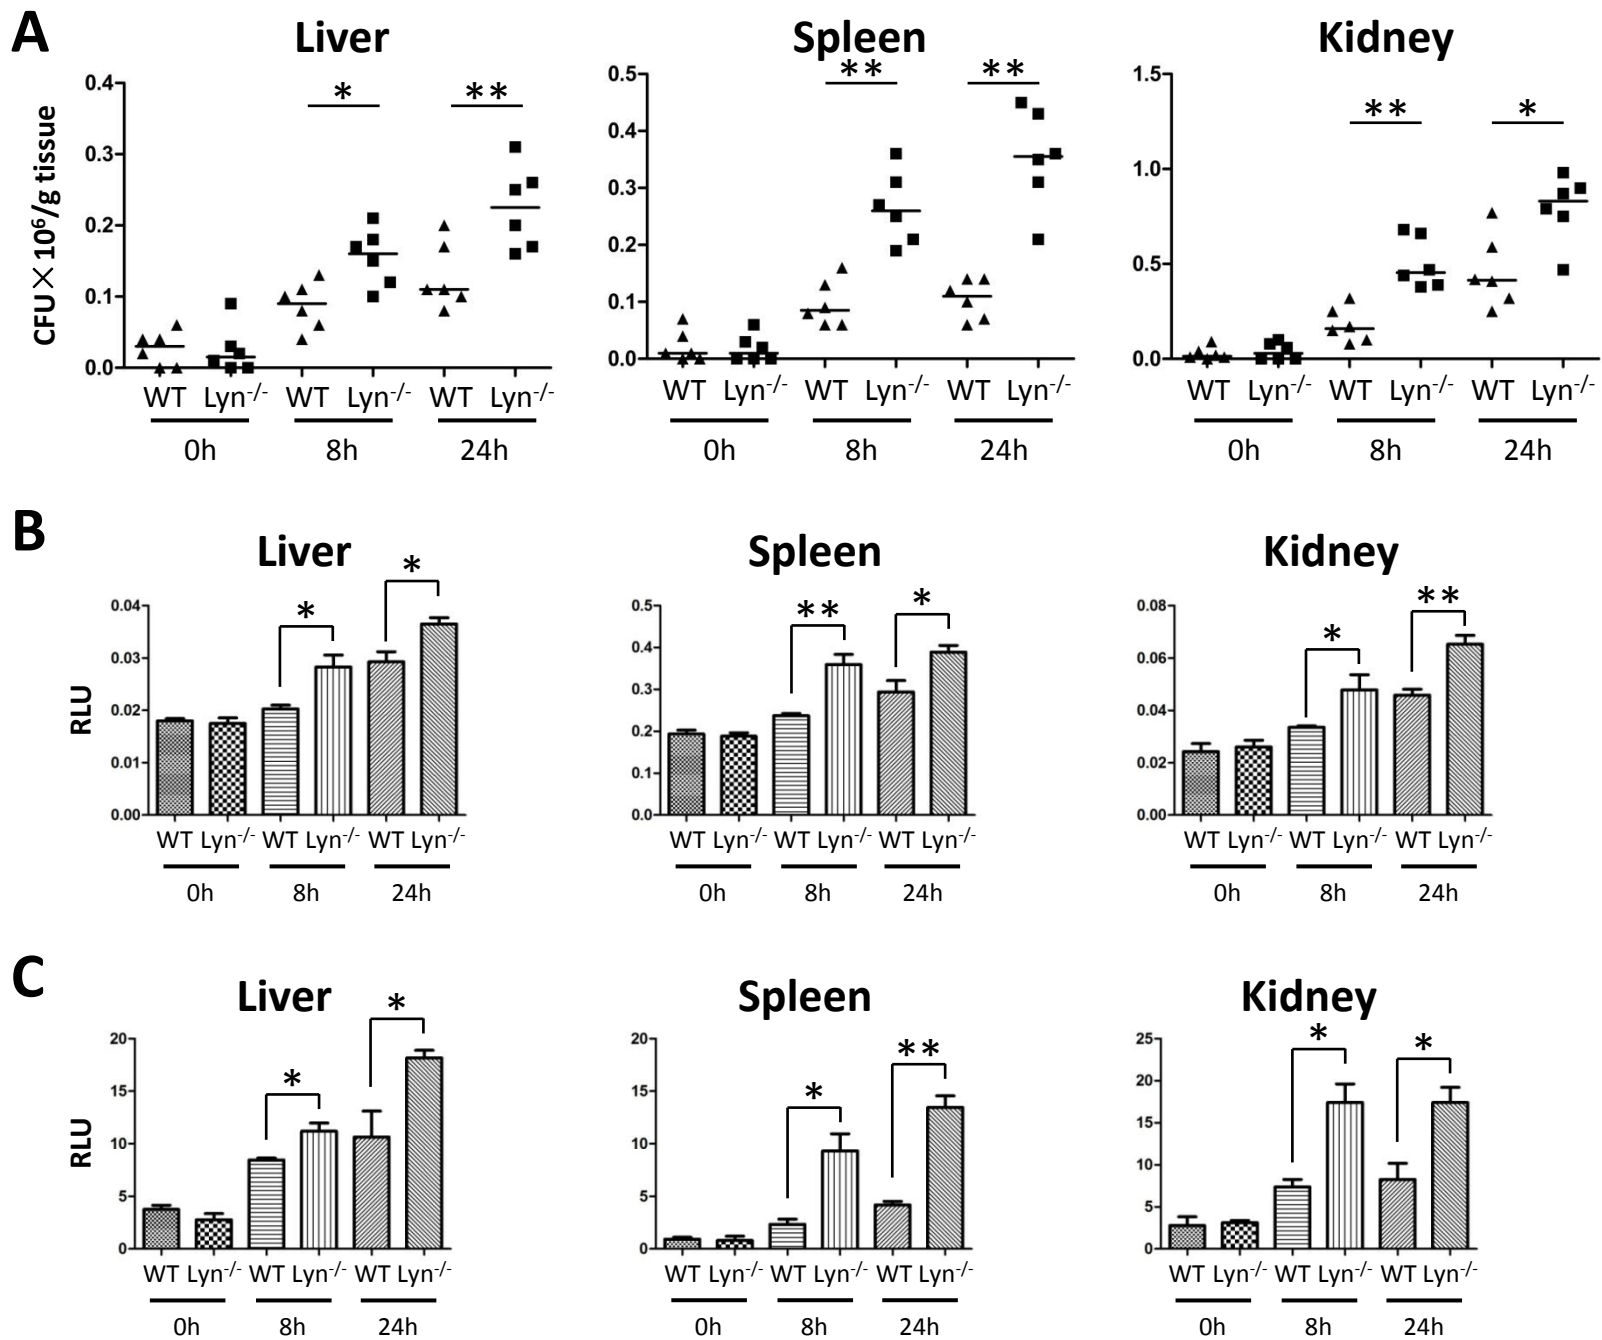

Figure S1

**A**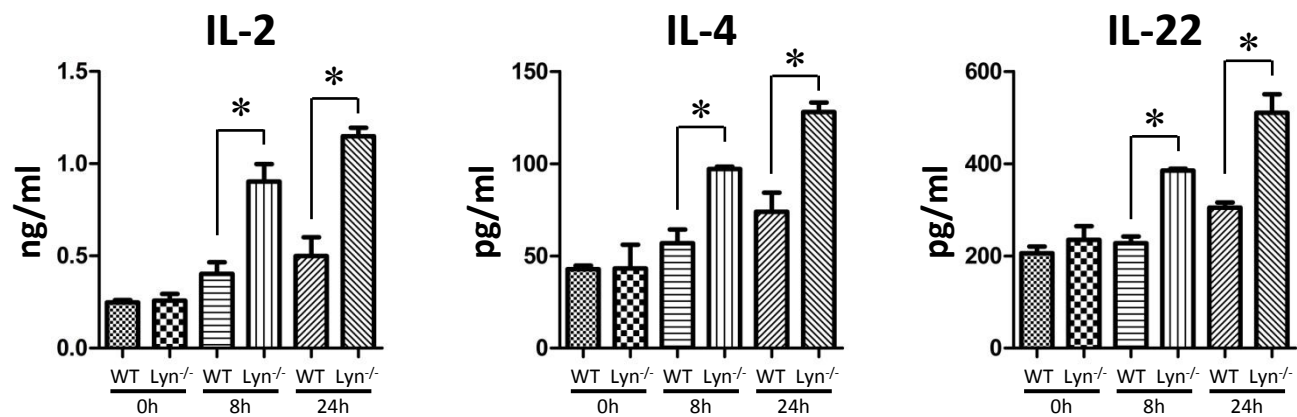**B**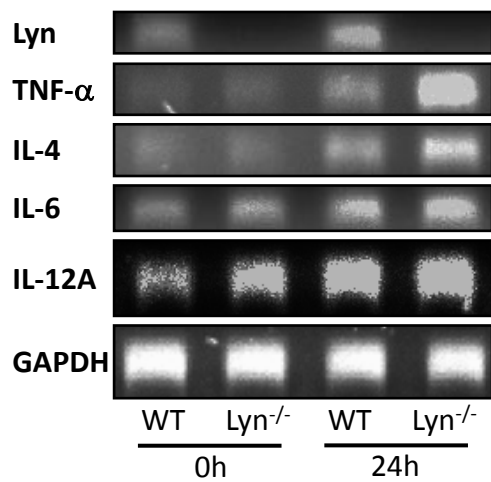**C**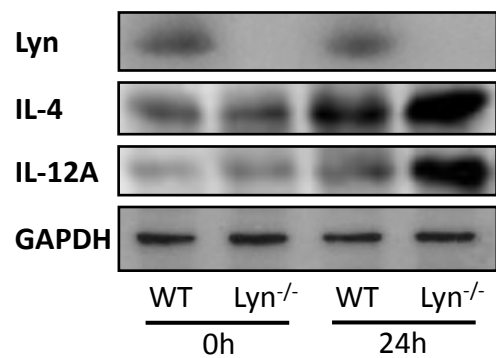

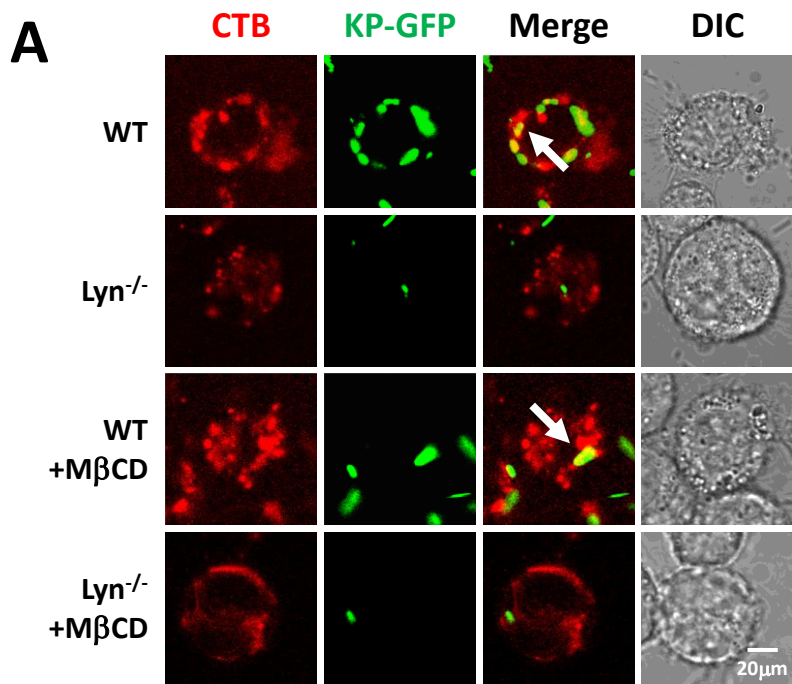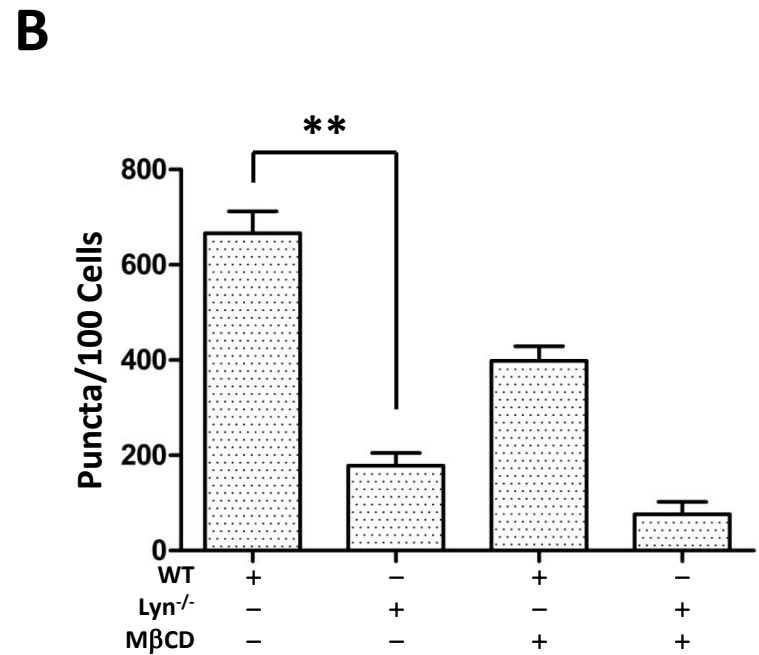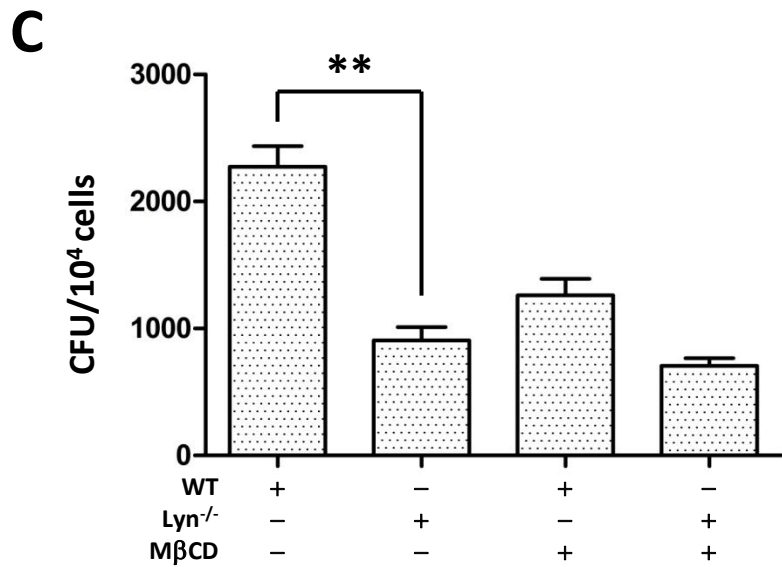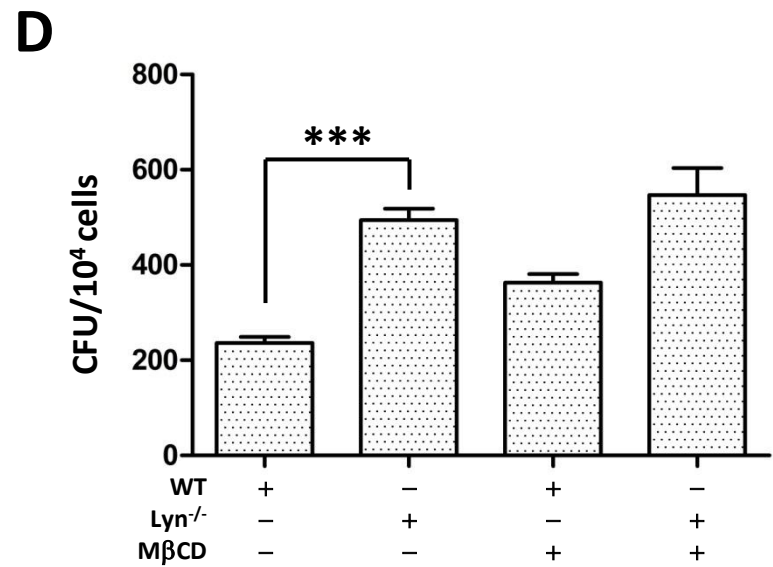

Figure S3

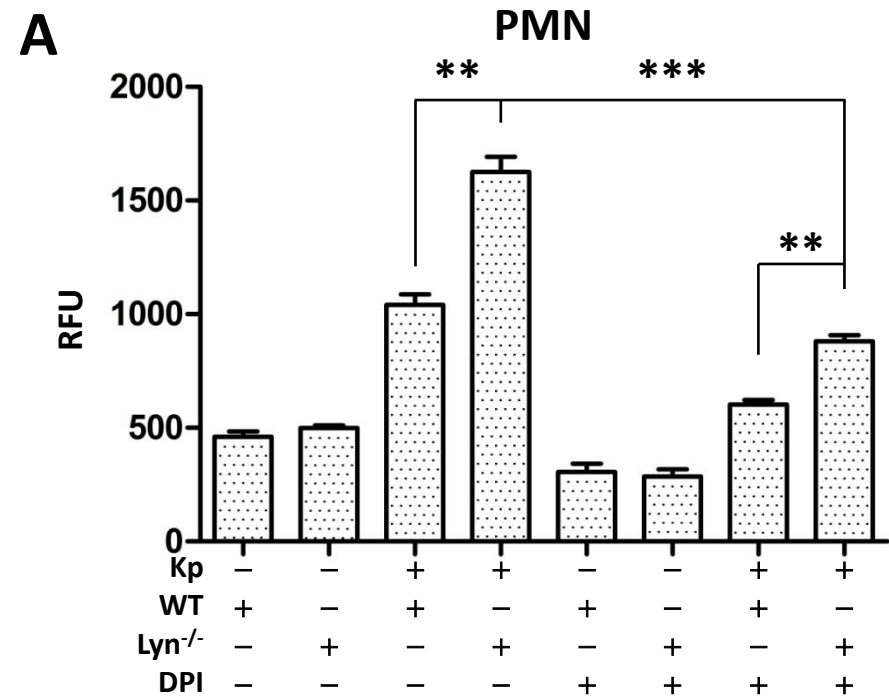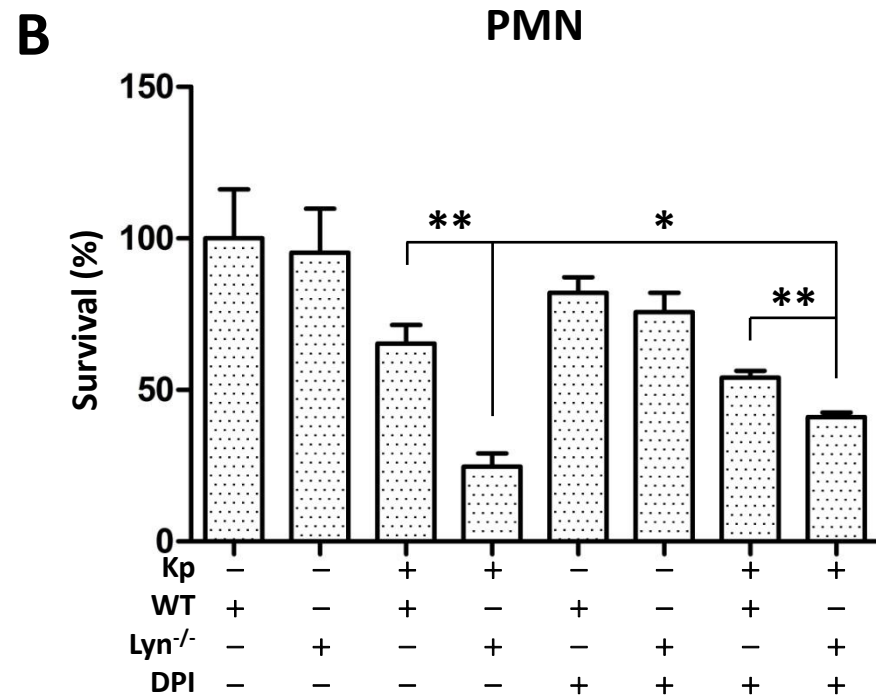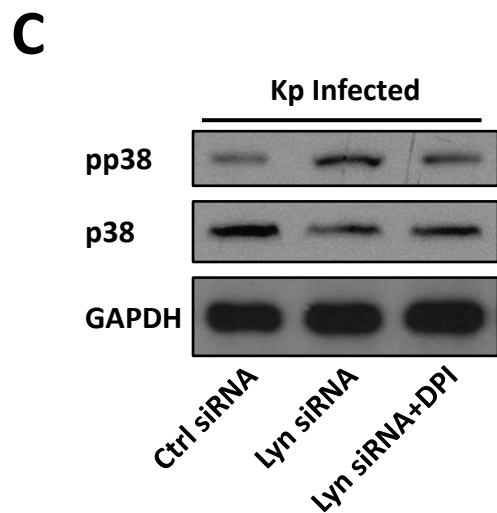

Figure S4

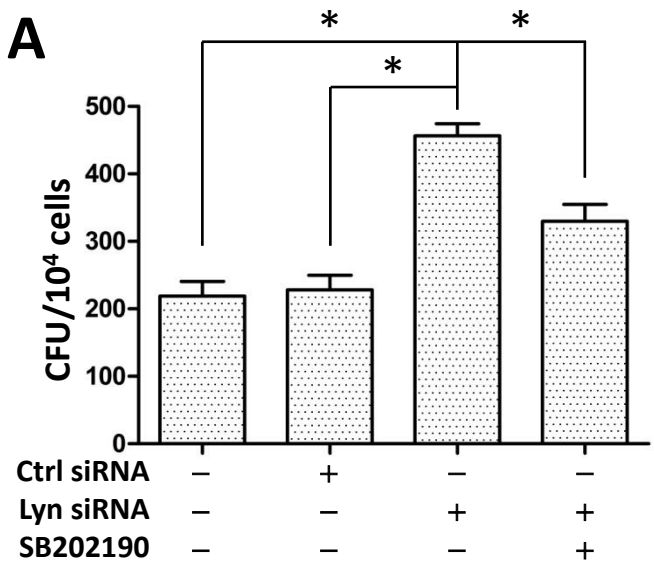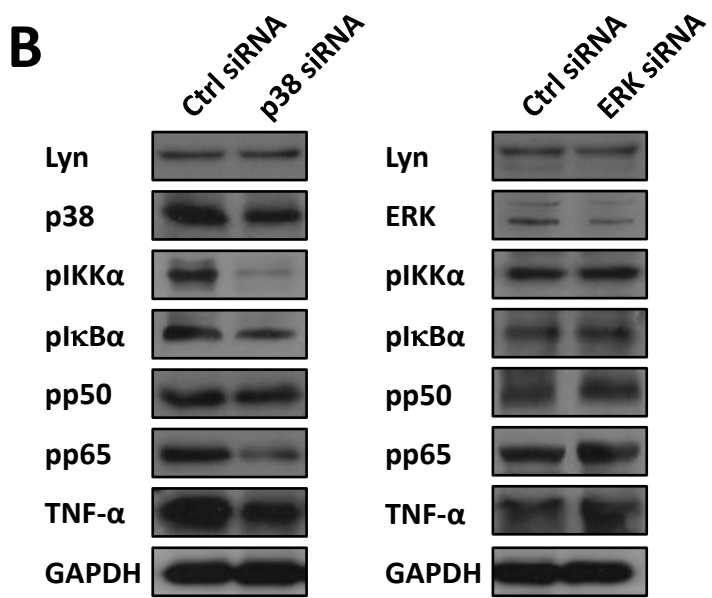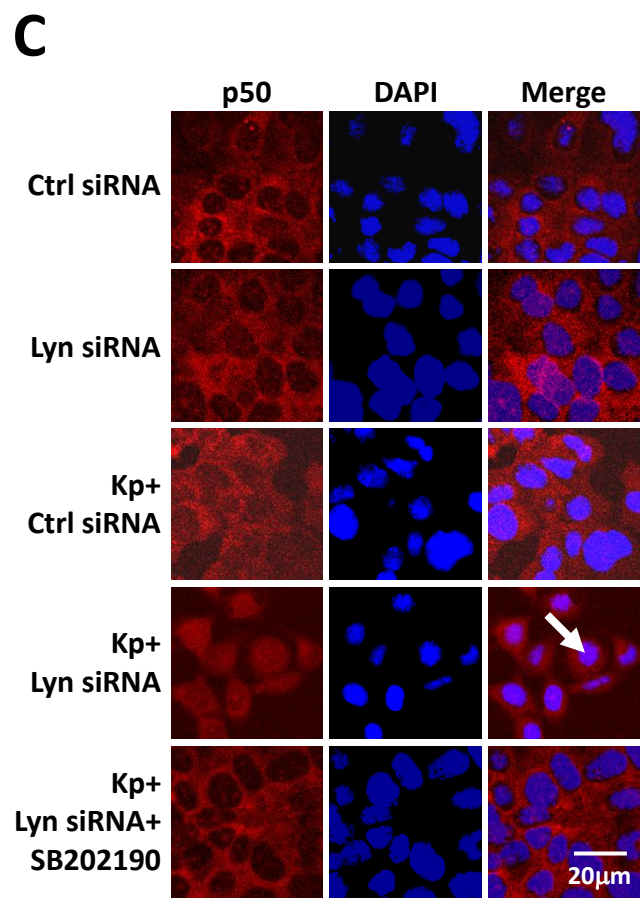

Figure S5

Supplement: NIHMS553951-supplement-02.pdf [file NIHMS553951-supplement-02.pdf]
